# Supplementary material for: Further Characterization of the Antiviral Transmembrane Protein MARCH8
Source: MDPI journal article supplement (doi:10.3390/cells13080698), 2024-04-17
Supplement: s1 [file s1]

## **Supplementary information**

### **Further Characterization of the Antiviral Transmembrane Protein MARCH8**

Takuya Tada, Yanzhao Zhang, Dechuan Kong, Michiko Tanaka, Weitong Yao,  
Masanori Kameoka, Takamasa Ueno, Hideaki Fujita,  
and Kenzo Tokunaga

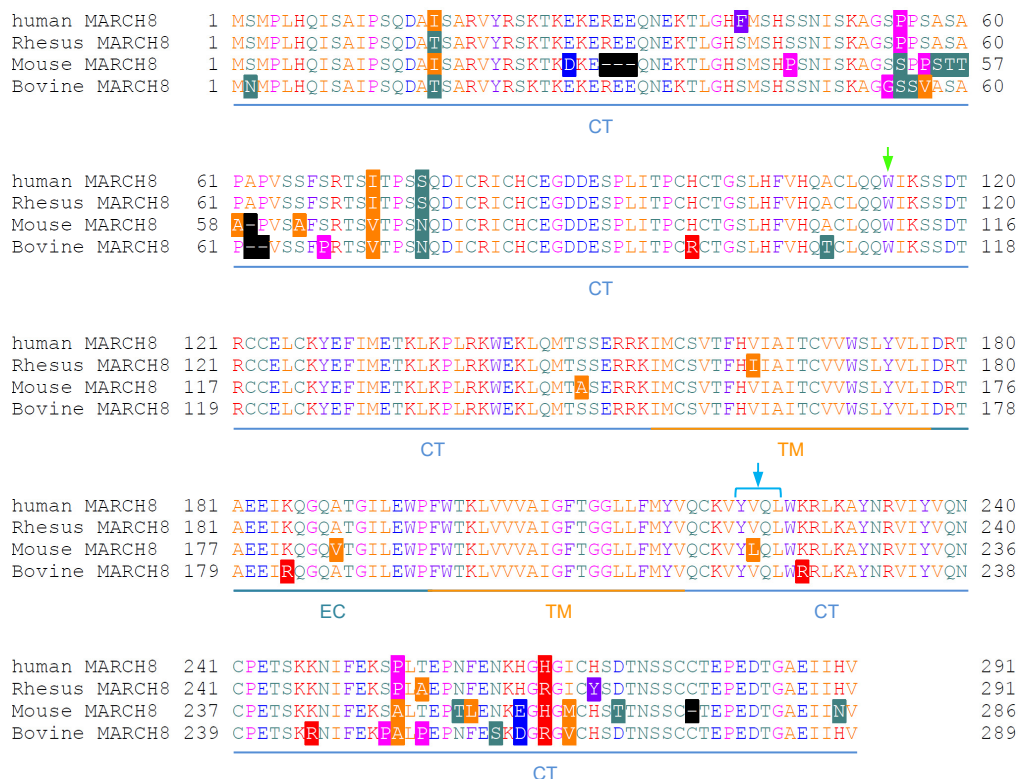

**Figure S1. Amino acid sequence alignments of the human, rhesus macaque, mouse, and bovine MARCH8 proteins.** Amino acid differences are boxed in several colors (polar neutral in green, aliphatic/hydrophobic in orange, aromatic/hydrophobic in purple, basic in red, acidic in blue, unique in pink, and absence in black). EC, extracellular domain; TM, transmembrane domain; CT, cytoplasmic tail. A well-conserved tryptophan residue, which is essential for ubiquitin ligase activity, indicated by a light green arrow; A well-conserved YxxΦ motif, indicated by a light blue arrow.

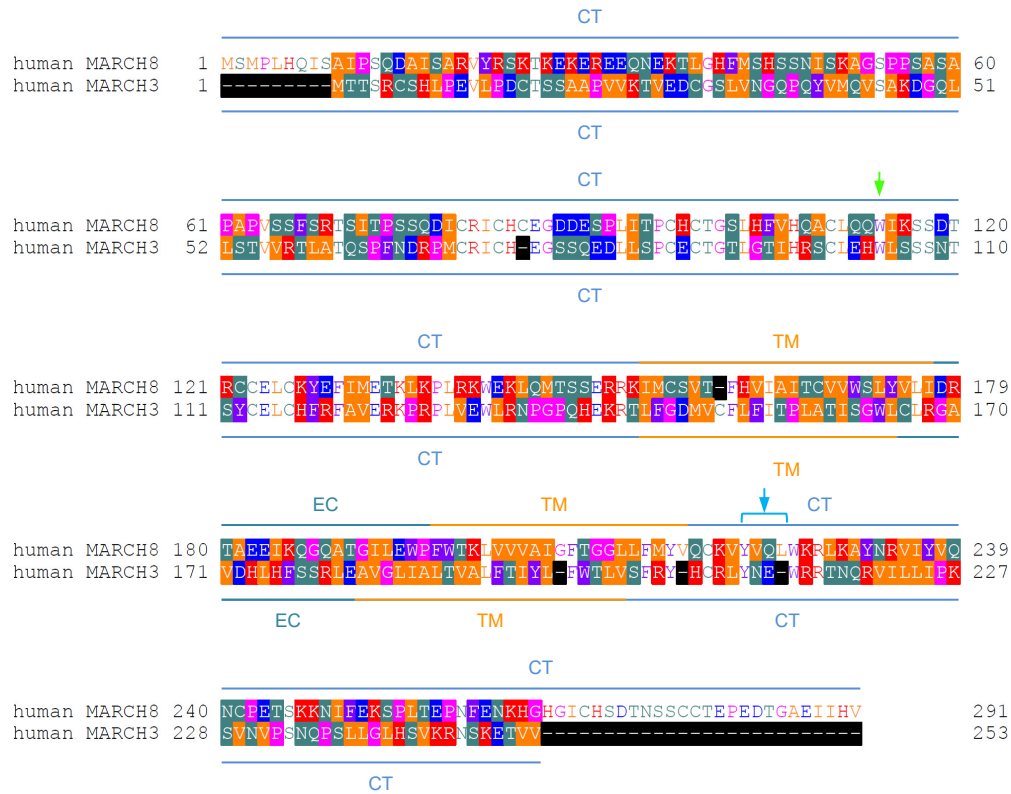

**Figure S2. Amino acid sequence alignments of the human MARCH8 and MARCH3 proteins.** Amino acid differences are boxed as depicted in Figure S1. EC, extracellular domain; TM, transmembrane domain; CT, cytoplasmic tail. A well-conserved tryptophan residue among mammalian MARCH proteins, which is indicated by a light green arrow, is also conserved in the human MARCH3 protein. MARCH8's YxxΦ motif in the C-terminal CT, indicated by a light blue arrow, is not seen in MARCH3.

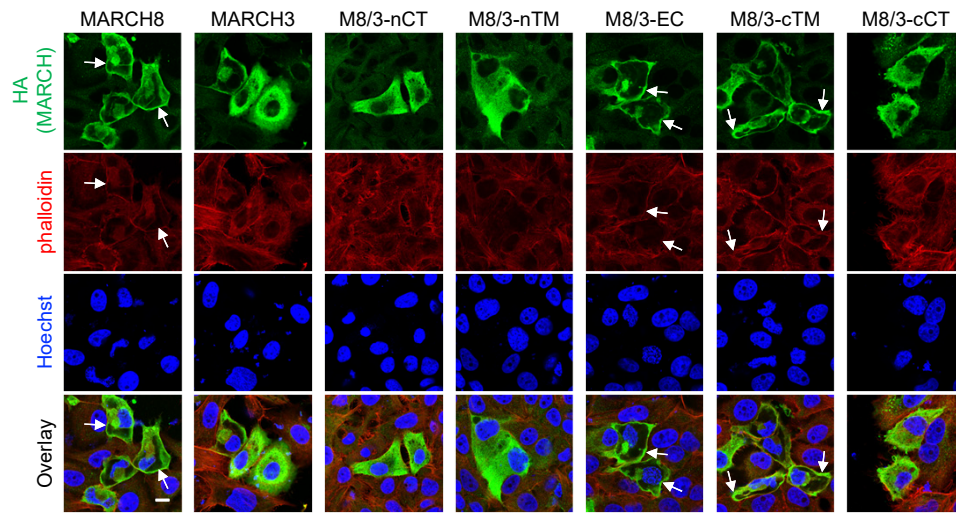

**Figure S3. Subcellular localization of MARCH8, MARCH3, and their chimeric proteins.** HeLa cells transfected with HA-tagged MARCH protein plasmids were analyzed using immunofluorescence microscopy. Anti-HA monoclonal antibody (primary) and Alexa 488-conjugated anti-mouse IgG (secondary) were used for detecting MARCH proteins (green). Hoechst 33342 (blue) and Phalloidin-TRITC (red) were used to stain the nucleus, and to provide cell morphology, respectively. MARCH8, M8/3-EC, and M8/3-cTM were detected at the plasma membrane (arrows), whereas MARCH3, M8/3-cCT, M8/3-nTM, and M8/3-cTM were exclusively cytoplasmic. Bar, 10  $\mu$ m.

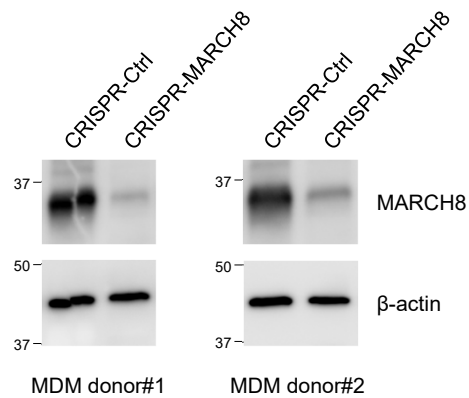

**Figure S4. Lentiviral CRISPR-Cas9-mediated knockout (right) of MARCH8 expression in MDMs.** Immunoblot images showing the expression of MARCH8 and  $\beta$ -actin in MDMs obtained from two donors. Lentiviral CRISPR-Cas9 technology was employed to knock out MARCH8 expression in MDMs.
