# Supplementary material for: Further Characterization of the Antiviral Transmembrane Protein MARCH8
Source: Cells. 2024 Apr 17;13(8):698. doi: 10.3390/cells13080698 (PMC11049619; doi:10.3390/cells13080698)
Supplement: Supplementary file 1 [file cells-13-00698-s001.zip › Table S1.xlsx]

## Sheet: Sheet1
	Designation	Source	Identifiers	Additional information
	MARCH8-XhoI-S	Zhang et al., 2020	ccgCTCGAGagcatgccactgcatcagat	Sense primer for pC-HA-rhMARCH8, pC-HA-rhMARCH8-W114A, and pC-HA-rhMARCH8-AxxL, pC-HA-MARCH8/3-nCT, pC-HA-MARCH8/3-nTM, pC-HA-MARCH8/3-EC, pC-HA-MARCH8/3-cTM, pC-HA-MARCH8/3-cCT
	MARCH8-NotI-A	Zhang et al., 2020	attGCGGCCGCtcagacgtgaatgatttctg	Antisense primer for pC-HA-HA-rhMARCH8, pC-HA-HA-rhMARCH8-W114A, and pC-HA-HA-rhMARCH8-AxxL, pC-HA-MARCH8/3-nCT, pC-HA-MARCH8/3-nTM, pC-HA-MARCH8/3-EC, pC-HA-MARCH8/3-cTM, pC-HA-MARCH8/3-cCT
	rhMARCH8-W114A-S	This paper	ggcctgcctgcaAcagGCCatcaagagctct	Overlapping PCR's sense primer for pC-HA-rhMARCH8-W114A
	rhMARCH8-W114A-A	This paper	agagctcttgatGGCctgTtgcaggcaggcc	Overlapping PCR's antisense primer for pC-HA-rhMARCH8-W114A
	rhMARCH8- 222AxxL225-S	This paper	tgtaaagtgGCtgtgcaGttgtggaagag	Overlapping PCR's sense primer for pC-HA-rhMARCH8-AxxL
	rhMARCH8- 222AxxL225-A	This paper	ctcttccacaaCtgcacaGCcactttaca	Overlapping PCR's antisense primer for pC-HA-rhMARCH8-AxxL
	muMARCH8-Xho-S	This paper	ccgCTCGAGagcatgccattgcaccagat	Sense primer for pC-HA-muMARCH8, pC-HA-muMARCH8-W110A, and pC-HA-muMARCH8-AxxL
	muMARCH8-Not-A	This paper	attGCGGCCGCtcagacgttaataatttctg	Antisense primer for pC-HA-muMARCH8, pC-HA-muMARCH8-W110A, and pC-HA-muMARCH8-AxxL
	muMARCH8-W110A-S	This paper	ggcttgcctgcaAcagGCCatcaagagttct	Overlapping PCR's sense primer for pC-HA-muMARCH8-W110A
	muMARCH8-W110A-A	This paper	agaactcttgatGGCctgTtgcaggcaagcc	Overlapping PCR's antisense primer for pC-HA-muMARCH8-W110A
	muMARCH8- 218AxxL221-S	This paper	gttcagtgcaaggtgGCcctGcagttatggaaaag	Overlapping PCR's sense primer for pC-HA-muMARCH8-AxxL
	muMARCH8- 218AxxL221-A	This paper	cttttccataactgCaggGCcaccttgcactgaac	Overlapping PCR's antisense primer for pC-HA-muMARCH8-AxxL
	boMARCH8-Xho-S	This paper	ccgCTCGAGaacatgccactgcatcagatc	Sense primer for pC-HA-boMARCH8, pC-HA-boMARCH8-W112A, and pC-HA-boMARCH8-AxxL
	boMARCH8-Not-A	This paper	attGCGGCCGCtcagacgtgaatgatctctg	Antisense primer for pC-HA-boMARCH8, pC-HA-boMARCH8-W112A, and pC-HA-boMARCH8-AxxL
	boMARCH8-W112A-S	This paper	gacctgcctgcagcagGCgatcaagagctccgac	Overlapping PCR's sense primer for pC-HA-boMARCH8-W110A
	boMARCH8-W112A-A	This paper	gtcggagctcttgatcGCctgctgcaggcaggtc	Overlapping PCR's antisense primer for pC-HA-boMARCH8-W110A
	boMARCH8- 220AxxL223-S	This paper	gttcagtgcaaagtgGCTgtacagttatggagg	Overlapping PCR's sense primer for pC-HA-boMARCH8-AxxL
	boMARCH8- 220AxxL223-A	This paper	cctccataactgtacAGCcactttgcactgaac	Overlapping PCR's antisense primer for pC-HA-boMARCH8-AxxL
	MARCH8-nCT-S	This paper	atcatgtgctcagtgacatt	Overlapping PCR's sense primer for pC-HA-MARCH8/3-nCT
	MARCH8/3-nCT-A	This paper	aatgtcactgagcacatgatAGTCCGCTTCTCATGCTGGG	Overlapping PCR's antisense primer for pC-HA-MARCH8/3-nCT
	MARCH8/3-nTM-S	This paper	tcttgtttataactcccctggccaccatctcgggctggctgGACCGTACTGCTGAGGAGATC	Overlapping PCR's sense primer for pC-HA-MARCH8/3-nTM
	MARCH8/3-nTM-A	This paper	caggggagttataaacaagaagcacaccatgtcgccaaacagCTTCCTGCGCTCGCTGGACG	Overlapping PCR's antisense primer for pC-HA-MARCH8/3-nTM
	MARCH8/3-EC-S	This paper	ACCACCTGCACTTTAGTAGTCGGCTGGAAttttggactaaattggtggt	Overlapping PCR's sense primer for pC-HA-MARCH8/3-EC
	MARCH8/3-EC-A	This paper	ACTACTAAAGTGCAGGTGGTCCACGGCGCCCCGCAGGCAaatgagcacatacaaggacc	Overlapping PCR's antisense primer for pC-HA-MARCH8/3-EC
	MARCH8/3-cTM-S	This paper	ctgtcgcactcttcactatttacctcttttggacactagtgCAGTGTAAAGTGTATGTGCAA	Overlapping PCR's sense primer for pC-HA-MARCH8/3-cTM
	MARCH8/3-cTM-A	This paper	aatagtgaagagtgcgacagtgagtgcaatcagtccgacggcGGGCCATTCTAGGATTCCTG	Overlapping PCR's antisense primer for pC-HA-MARCH8/3-cTM
	MARCH8/3-cCT-S	This paper	gacttctttttatgtatgttTCATTTAGGTACCACTGTCG	Overlapping PCR's sense primer for pC-HA-MARCH8/3-cCT
	MARCH8-cTM-A	This paper	aacatacataaaaagaagtc	Overlapping PCR's antisense primer for pC-HA-MARCH8/3-cCT
